# Supplementary material
Source: Springer Nature journal article supplement (https://www.springermedizin.de/resource/supplementary/12933_2011_371_MOESM1_ESM.pdf/9538254)

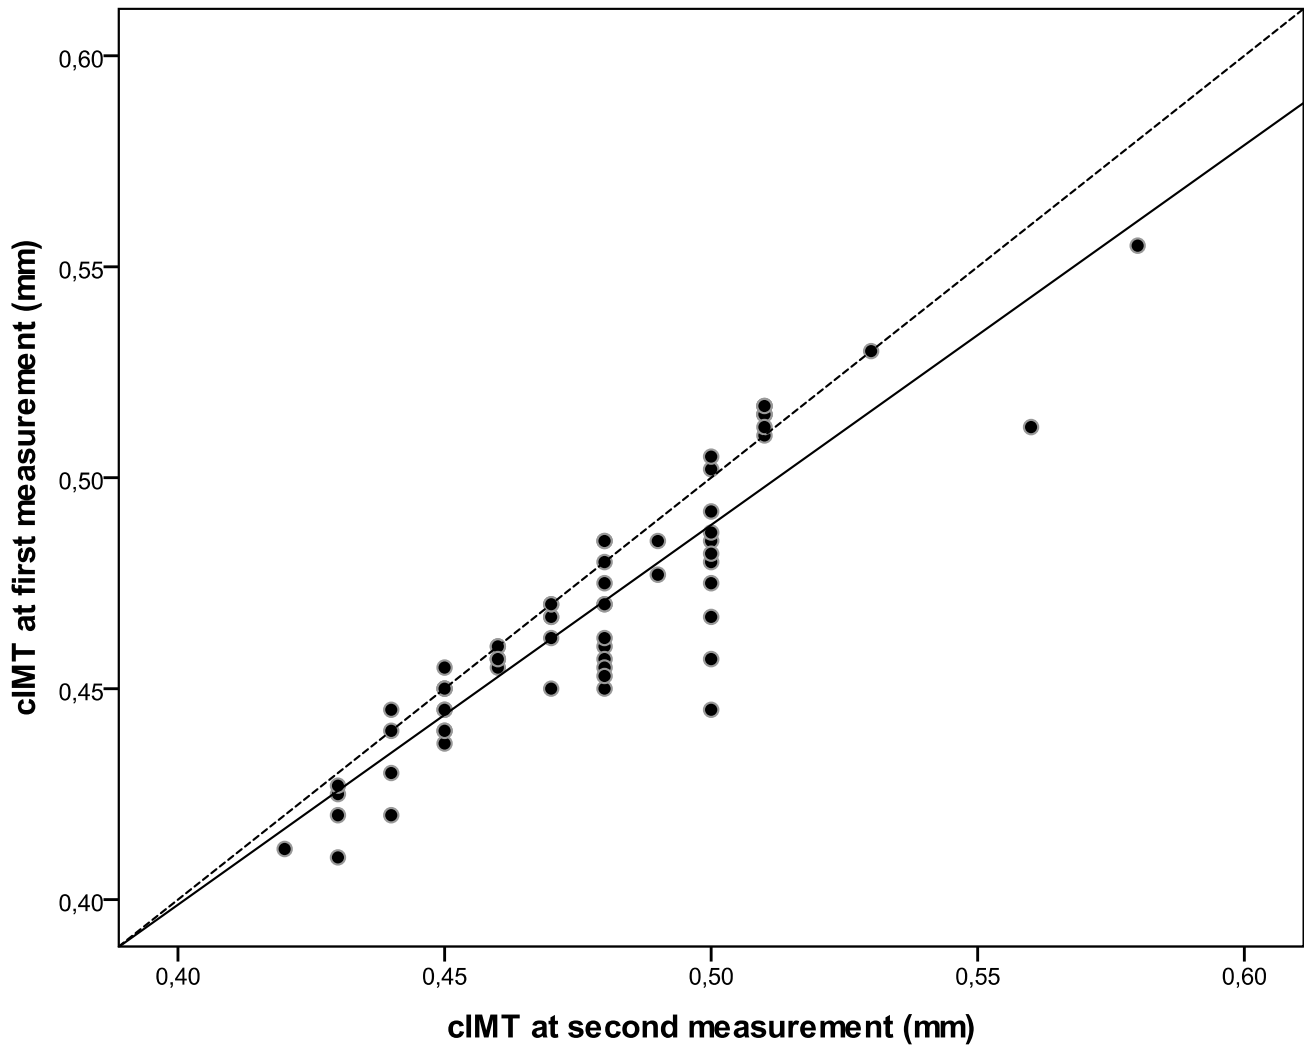

Supplement: MOESM1 [file 9538254]
